# Supplementary material for: Whole genome microarray analysis of neural progenitor C17.2 cells during differentiation and validation of 30 neural mRNA biomarkers for estimation of developmental neurotoxicity
Source: PubMed Central journal article supplement (PMC5738075; doi:10.1371/journal.pone.0190066), 2017-12-20
Supplement: pone.0190066.s005.pdf [file pone.0190066.s005.pdf]

**S1 Table. Gene lists used for gene enrichment analysis for selection of genes important for differentiation of the C17.2 cell line.**

| <b>Gene set enrichment analysis list using Gene set enrichment analysis</b><br><a href="http://software.broadinstitute.org/gsea/index.jsp">http://software.broadinstitute.org/gsea/index.jsp</a> |                                                                                                                                                                                                                                                                            |
|--------------------------------------------------------------------------------------------------------------------------------------------------------------------------------------------------|----------------------------------------------------------------------------------------------------------------------------------------------------------------------------------------------------------------------------------------------------------------------------|
| 1.                                                                                                                                                                                               | LEIN_OLIGODENDROCYTE_MARKERS<br><a href="http://www.broadinstitute.org/gsea/msigdb/cards/LEIN_OLIGODENDROCYTE_MARKERS.html">http://www.broadinstitute.org/gsea/msigdb/cards/LEIN_OLIGODENDROCYTE_MARKERS.html</a>                                                          |
| 2.                                                                                                                                                                                               | GOBERT_OLIGODENDROCYTE_DIFFERENTIATION_UP<br><a href="http://www.broadinstitute.org/gsea/msigdb/cards/GOBERT_OLIGODENDROCYTE_DIFFERENTIATION_UP">http://www.broadinstitute.org/gsea/msigdb/cards/GOBERT_OLIGODENDROCYTE_DIFFERENTIATION_UP</a>                             |
| 3.                                                                                                                                                                                               | GOBERT_OLIGODENDROCYTE_DIFFERENTIATION_DN<br><a href="http://www.broadinstitute.org/gsea/msigdb/cards/GOBERT_OLIGODENDROCYTE_DIFFERENTIATION_DN.html">http://www.broadinstitute.org/gsea/msigdb/cards/GOBERT_OLIGODENDROCYTE_DIFFERENTIATION_DN.html</a>                   |
| 4.                                                                                                                                                                                               | LEIN_ASTROCYTE_MARKERS<br><a href="http://www.broadinstitute.org/gsea/msigdb/cards/LEIN_ASTROCYTE_MARKERS.html">http://www.broadinstitute.org/gsea/msigdb/cards/LEIN_ASTROCYTE_MARKERS.html</a>                                                                            |
| 5.                                                                                                                                                                                               | CAHOY_ASTROCYTIC<br><a href="http://www.broadinstitute.org/gsea/msigdb/cards/CAHOY_ASTROCYTIC.html">http://www.broadinstitute.org/gsea/msigdb/cards/CAHOY_ASTROCYTIC.html</a>                                                                                              |
| 6.                                                                                                                                                                                               | LEIN_NEURON_MARKERS<br><a href="http://www.broadinstitute.org/gsea/msigdb/cards/LEIN_NEURON_MARKERS.html">http://www.broadinstitute.org/gsea/msigdb/cards/LEIN_NEURON_MARKERS.html</a>                                                                                     |
| 7.                                                                                                                                                                                               | CAHOY_NEURONAL<br><a href="http://www.broadinstitute.org/gsea/msigdb/cards/CAHOY_NEURONAL.html">http://www.broadinstitute.org/gsea/msigdb/cards/CAHOY_NEURONAL.html</a>                                                                                                    |
| 8.                                                                                                                                                                                               | LEIN_LOCALIZED_TO_DISTAL_AND_PROXIMAL_DENDRITES<br><a href="http://www.broadinstitute.org/gsea/msigdb/cards/LEIN_LOCALIZED_TO_DISTAL_AND_PROXIMAL_DENDRITES.html">http://www.broadinstitute.org/gsea/msigdb/cards/LEIN_LOCALIZED_TO_DISTAL_AND_PROXIMAL_DENDRITES.html</a> |
| 9.                                                                                                                                                                                               | GO_SYNAPSE<br><a href="http://software.broadinstitute.org/gsea/msigdb/cards/GO_SYNAPSE.html">http://software.broadinstitute.org/gsea/msigdb/cards/GO_SYNAPSE.html</a>                                                                                                      |
| 10.                                                                                                                                                                                              | LEIN_LOCALIZED_TO_PROXIMAL_DENDRITES<br><a href="http://www.broadinstitute.org/gsea/msigdb/cards/LEIN_LOCALIZED_TO_PROXIMAL_DENDRITES.html">http://www.broadinstitute.org/gsea/msigdb/cards/LEIN_LOCALIZED_TO_PROXIMAL_DENDRITES.html</a>                                  |
| 11.                                                                                                                                                                                              | WONG_ADULT_TISSUE_STEM_MODULE<br><a href="http://software.broadinstitute.org/gsea/msigdb/cards/WONG_ADULT_TISSUE_STEM_MODULE.html">http://software.broadinstitute.org/gsea/msigdb/cards/WONG_ADULT_TISSUE_STEM_MODULE.html</a>                                             |
| 12.                                                                                                                                                                                              | REACTOME_NEURONAL_SYSTEM<br><a href="https://bioinfo.uth.edu/SZGR1/showGenesByPathway.do?pathway=p874">https://bioinfo.uth.edu/SZGR1/showGenesByPathway.do?pathway=p874</a>                                                                                                |
| 13.                                                                                                                                                                                              | LEIN_MIDBRAIN_MARKERS<br><a href="http://software.broadinstitute.org/gsea/msigdb/cards/LEIN_MIDBRAIN_MARKERS.html">http://software.broadinstitute.org/gsea/msigdb/cards/LEIN_MIDBRAIN_MARKERS.html</a>                                                                     |
| 14.                                                                                                                                                                                              | NEUROGENESIS<br><a href="http://software.broadinstitute.org/gsea/msigdb/cards/NEUROGENESIS.html">http://software.broadinstitute.org/gsea/msigdb/cards/NEUROGENESIS.html</a>                                                                                                |
| 15.                                                                                                                                                                                              | AXON<br><a href="http://software.broadinstitute.org/gsea/msigdb/cards/AXON.html">http://software.broadinstitute.org/gsea/msigdb/cards/AXON.html</a>                                                                                                                        |
| 16.                                                                                                                                                                                              | CAHOY_OLIGODENDROCUTIC<br><a href="http://software.broadinstitute.org/gsea/msigdb/cards/CAHOY_OLIGODENDROCUTIC.html">http://software.broadinstitute.org/gsea/msigdb/cards/CAHOY_OLIGODENDROCUTIC.html</a>                                                                  |
| 17.                                                                                                                                                                                              | LEIN_CEREBELLUM_MARKERS<br><a href="http://software.broadinstitute.org/gsea/msigdb/cards/LEIN_CEREBELLUM_MARKERS.html">http://software.broadinstitute.org/gsea/msigdb/cards/LEIN_CEREBELLUM_MARKERS.html</a>                                                               |
| 18.                                                                                                                                                                                              | ESC_V6.5_UP_EARLY.V1_UP<br><a href="http://software.broadinstitute.org/gsea/msigdb/cards/ESC_J1_UP_EARLY.V1_UP.html">http://software.broadinstitute.org/gsea/msigdb/cards/ESC_J1_UP_EARLY.V1_UP.html</a>                                                                   |
| 19.                                                                                                                                                                                              | MATZUK_EMBRYONIC_GERM_CELL<br><a href="http://software.broadinstitute.org/gsea/msigdb/cards/MATZUK_EMBRYONIC_GERM_CELL.html">http://software.broadinstitute.org/gsea/msigdb/cards/MATZUK_EMBRYONIC_GERM_CELL.html</a>                                                      |
| 20.                                                                                                                                                                                              | AXONOGENESIS<br><a href="http://software.broadinstitute.org/gsea/msigdb/cards/AXONOGENESIS.html">http://software.broadinstitute.org/gsea/msigdb/cards/AXONOGENESIS.html</a>                                                                                                |
