# Supplementary material for: Whole genome microarray analysis of neural progenitor C17.2 cells during differentiation and validation of 30 neural mRNA biomarkers for estimation of developmental neurotoxicity
Source: PubMed Central journal article supplement (PMC5738075; doi:10.1371/journal.pone.0190066), 2017-12-20
Supplement: pone.0190066.s006.pdf [file pone.0190066.s006.pdf]

**S2 Table. The 30 selected genes including their description, protein function, gene set enrichment list they were curated from and references.**

| Gene   | Gene description                                     | Protein function/Biological process                                 | Gene set enrichment list                  |
|--------|------------------------------------------------------|---------------------------------------------------------------------|-------------------------------------------|
| BMP4   | Bone Morphogenetic Protein 4                         | Neurogenesis, Axonal guidance                                       | MATZUK_EMBRYONIC_GERM_CELL                |
| CAMK2A | Calcium/Calmodulin-Dependent Protein Kinase II Alpha | Synaptic transmission                                               | LEIN_NEURON_MARKERS                       |
| CHRD1  | Chordin-Like Protein 1                               | Neurogenesis, Neuronal differentiation                              | CAHOY_ASTROCYTIC                          |
| CX3CL1 | Fractalkine                                          | Neuronal chemokine, Synaptic plasticity                             | LEIN_NEURON_MARKERS                       |
| CYFIP2 | Cytoplasmic FMR1 Interacting Protein 2               | Neuronal connectivity, Neuronal polarization                        | LEIN_NEURON_MARKERS, AXONOGENESIS         |
| EGR1   | Early Growth Response protein 1                      | Neuronal plasticity, Neuronal differentiation                       | LEIN_NEURON_MARKERS                       |
| FAM20A | Family With Sequence Similarity 20, Member A         | Gene up-regulated in astrocytes                                     | CAHOY_ASTROCYTIC                          |
| GABRR2 | Gamma-Aminobutyric Acid A Receptor, Rho 2            | Synaptic transmission                                               | GO_SYNAPSE                                |
| LYNX1  | Ly-6/Neurotoxin-like protein 1                       | Neuromodulator                                                      | LEIN_LOCALIZED_TO_PROXIMAL_DENDRITES      |
| MAPT   | Microtubule-Associated Protein Tau                   | Axonogenesis, Neuronal polarity                                     | NEUROGENESIS, AXONOGENESIS                |
| NDFIP1 | Nedd4 Family-Interacting Protein 1                   | Neurogenesis, Development of dendrites and spines                   | LEIN_NEURON_MARKERS                       |
| NTN1   | Netrin-1                                             | Axonal guidance, Neuronal migration                                 | LEIN_CEREBELLUM_MARKERS                   |
| OLIG2  | Oligodendrocyte Transcription Factor 2               | Oligodendrocyte differentiation, Neural stem cell proliferation     | LEIN_OLIGODENDROCYTE_MARKERS              |
| PARD3B | Par-3 Family Cell Polarity Regulator Beta            | Axonogenesis, Neurogenesis, Neuronal migration                      | NEUROGENESIS, AXONOGENESIS                |
| PLXDC2 | Plexin Domain-Containing Protein 2                   | Mitogen for neural progenitors, Neurogenesis, Neuronal connectivity | GOBERT_OLIGODENDROCYTE_DIFFERENTIATION_DN |
| PLXNA3 | Plexin-A3                                            | Axonal guidance, Neuronal migration                                 | GOBERT_OLIGODENDROCYTE_DIFFERENTIATION_DN |
| PLXNB3 | Plexin B3                                            | Neurogenesis, Axonal guidance                                       | CAHOY_OLIGODENDROCYTIC                    |
| PRDM8  | PR Domain Zinc Finger Protein 8                      | Neuronal development                                                | CAHOY_NEURONAL                            |
| PTGDS  | Prostaglandin D2 Synthase 21kDa (Brain)              | Neuromodulator and trophic factor in the CNS                        | LEIN_MIDBRAIN_MARKERS                     |
| ROBO1  | Roundabout homolog 1                                 | Axonal guidance, Neuronal migration                                 | NEUROGENESIS, AXONOGENESIS                |

|         |                                       |                                                           |                                           |
|---------|---------------------------------------|-----------------------------------------------------------|-------------------------------------------|
| RTN4R   | Reticulon-4 Receptor/Nogo-66 receptor | Axonogenesis                                              | NEUROGENESIS                              |
| S100B   | S100 Calcium Binding Protein B        | Astrocyte differentiation, Axonogenesis                   | NEUROGENESIS, AXONOGENESIS                |
| S1PR1   | Sphingosine-1-Phosphate Receptor 1    | Neurogenesis, Glial migration and Astrocyte proliferation | LEIN_ASTROCYTE_MARKERS                    |
| SEMA5B  | Semaphorin-5B                         | Regulation of synapse density, Axonal guidance            | GOBERT_OLIGODENDROCYTE_DIFFERENTIATION_DN |
| SLC6A7  | Sodium-Dependent Proline Transporter  | Synaptic transmission                                     | CAHOY_NEURONAL                            |
| SLIT2   | Slit Homolog 2 protein                | Axonal guidance, Neuronal migration                       | NEUROGENESIS, AXONOGENESIS                |
| SMARCA2 | Transcription Activator SNF2L2        | Neurogenesis, Neural stem cell proliferation              | LEIN_NEURON_MARKERS                       |
| SNAPIN  | SNAP-Associated Protein Snapin        | Synaptic transmission, Synaptic vesicle recycling         | GOBERT_OLIGODENDROCYTE_DIFFERENTIATION_DN |
| SPARCL1 | SPARC-Like protein 1 (Hevin)          | Secreted by astrocytes, Neuromodulator                    | LEIN_ASTROCYTE_MARKERS                    |
| STX5A   | Syntaxin-5                            | Neuronal development, Vesicle transporting                | REACTOME_NEURONAL_SYSTEM                  |
