# Supplementary material for: Whole genome microarray analysis of neural progenitor C17.2 cells during differentiation and validation of 30 neural mRNA biomarkers for estimation of developmental neurotoxicity
Source: PubMed Central journal article supplement (PMC5738075; doi:10.1371/journal.pone.0190066), 2017-12-20
Supplement: pone.0190066.s007.pdf [file pone.0190066.s007.pdf]

**S3 Table. Target stability function analysis of the three reference genes using the Bio-Rad CFX manager 3.1 software system.**

| <b>Target reference gene</b> | <b>Coefficient Variance</b> | <b>M Value</b> |
|------------------------------|-----------------------------|----------------|
| <b>Rplp1</b>                 | <b>0,1621</b>               | <b>0,4092</b>  |
| <b>Tbp</b>                   | <b>0,1243</b>               | <b>0,3205</b>  |
| <b>Hsp90ab1</b>              | <b>0,1194</b>               | <b>0,3184</b>  |

This function uses an iterative test of pairwise validation described by (Vandesompele et al., 2002). Recommended coefficient variance should be <0.25 and M value should be <0.5 for homogenous samples.
